# Supplementary material for: Metallic WN plasmonic fabricated g-C3N4 significantly steered photocatalytic hydrogen evolution under visible and near-infrared light
Source: Royal Society of Chemistry journal article supplement (doi:10.1039/d2cy01499h), 2022-01-01
Supplement: d2cy01499h1.pdf [file d2cy01499h1.pdf]

## Supporting Information

# Metallic WN Plasmonic Fabricated g-C<sub>3</sub>N<sub>4</sub> Significantly Steered Photocatalytic Hydrogen Evolution under Visible and Near-Infrared Light

Warisha Tahir,<sup>a</sup> Sami Ullah,<sup>b</sup> Ikram Ullah,<sup>a</sup> Jing-Han Li,<sup>a</sup> Cong Ling,<sup>a</sup> Xiao-Jie Lu,<sup>a</sup>

Xiao-Jun Qian,<sup>c</sup> Gang Wang,<sup>c\*</sup> Yueyin Pan,<sup>c\*</sup> and An-Wu Xu<sup>a\*</sup>

**Table S1.** Comparison of photocatalytic hydrogen evolution rate with previous literature.

| Material                                                              | Synthetic Method                    | Co-Catalyst               | H <sub>2</sub> (μmol h <sup>-1</sup> ) | Ref.                |
|-----------------------------------------------------------------------|-------------------------------------|---------------------------|----------------------------------------|---------------------|
| g-C <sub>3</sub> N <sub>4</sub> -TiO <sub>2</sub>                     | Photodeposition,<br>Hydrothermal    | TEOA/3 wt%<br>Pt          | 79.28                                  | [1]                 |
| O-g-C <sub>3</sub> N <sub>4</sub> -TiO <sub>2</sub>                   | Photo-deposition,<br>Hydrothermal   | TEOA/3 wt%<br>Pt          | 29.35                                  | [2]                 |
| g-C <sub>3</sub> N <sub>4</sub> -TiO <sub>2</sub>                     | Electro-spinning,<br>Heat treatment | TEOA/1wt%<br>Au, Ag or Pt | 1.50                                   | [3]                 |
| g-C <sub>3</sub> N <sub>4</sub> -NPBIm                                | Hydrothermal                        | TEOA/1 wt%<br>Pt          | 46.97                                  | [4]                 |
| g-C <sub>3</sub> N <sub>4</sub> -CoO                                  | Hydrothermal                        | TEOA/3 wt%<br>Pt          | 65.35                                  | [5]                 |
| g-C <sub>3</sub> N <sub>4</sub> -<br>CoFe <sub>2</sub> O <sub>3</sub> | Hydrothermal                        | TEOA/1wt%<br>Pt           | 18.61                                  | [6]                 |
| <b>g-C<sub>3</sub>N<sub>4</sub>-WN</b>                                | <b>Hydrothermal</b>                 | <b>TEOA/1<br/>wt% Pt</b>  | <b>72.15</b>                           | <b>Our<br/>work</b> |

**Table S1.** Fitting parameters of EIS results

| Samples                                    | R <sub>s</sub> | R <sub>ct</sub> |
|--------------------------------------------|----------------|-----------------|
| g-C <sub>3</sub> N <sub>4</sub> nanosheets | 23.2           | 1492            |
| WN/CN-1 photocatalyst                      | 14.8           | 834             |

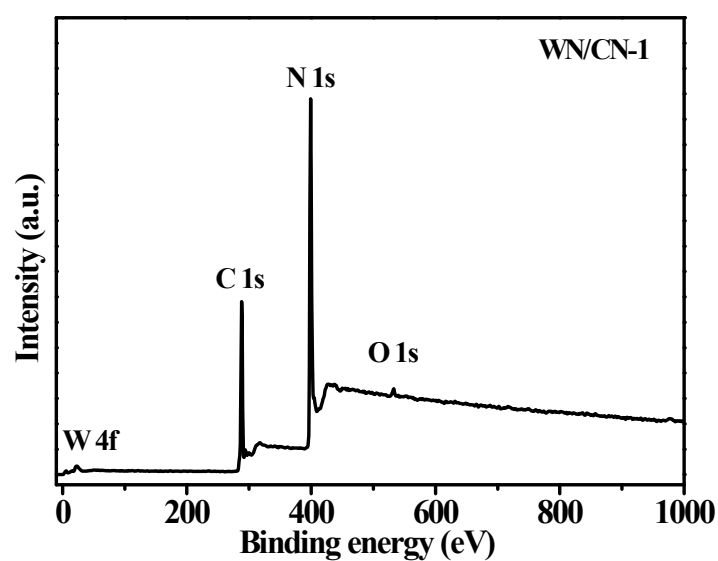

**Figure S1.** XPS spectrum of WN/CN-1 photocatalyst.

**Figure S2.** XPS-VBM of WN NPs.

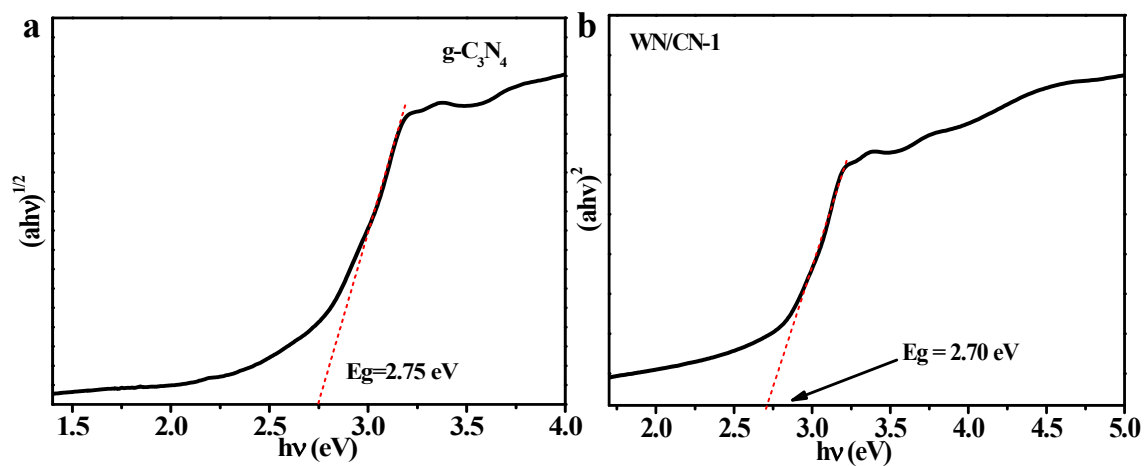

**Figure S3.** The Kubelka-Munk energy band gap graph of  $g\text{-C}_3\text{N}_4$  (a) and WN/CN-1

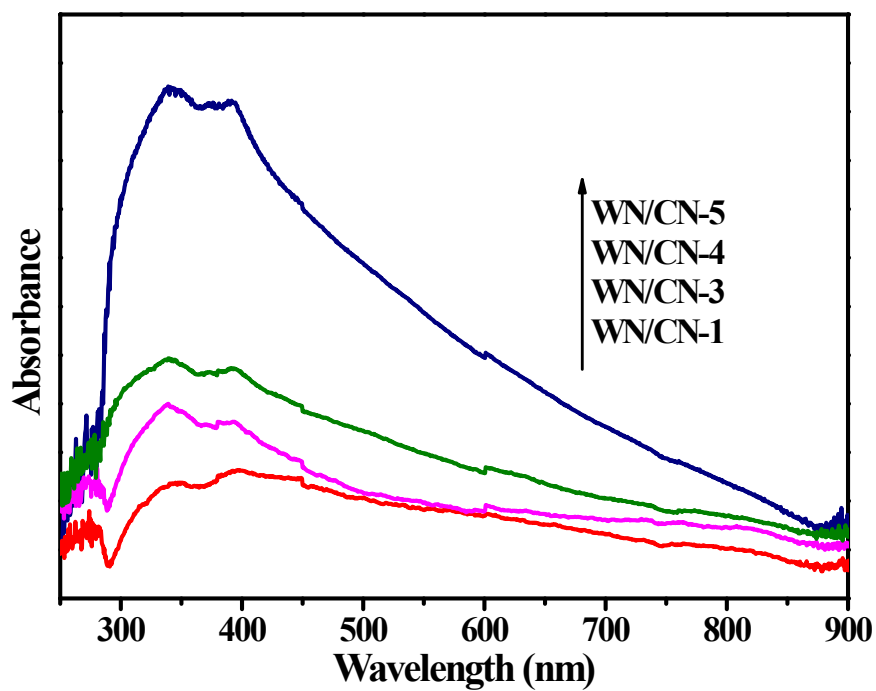

**Figure S4.** UV-vis absorption spectra of WN/CN-x composites with different weight contents of WN NPs in aqueous solution.

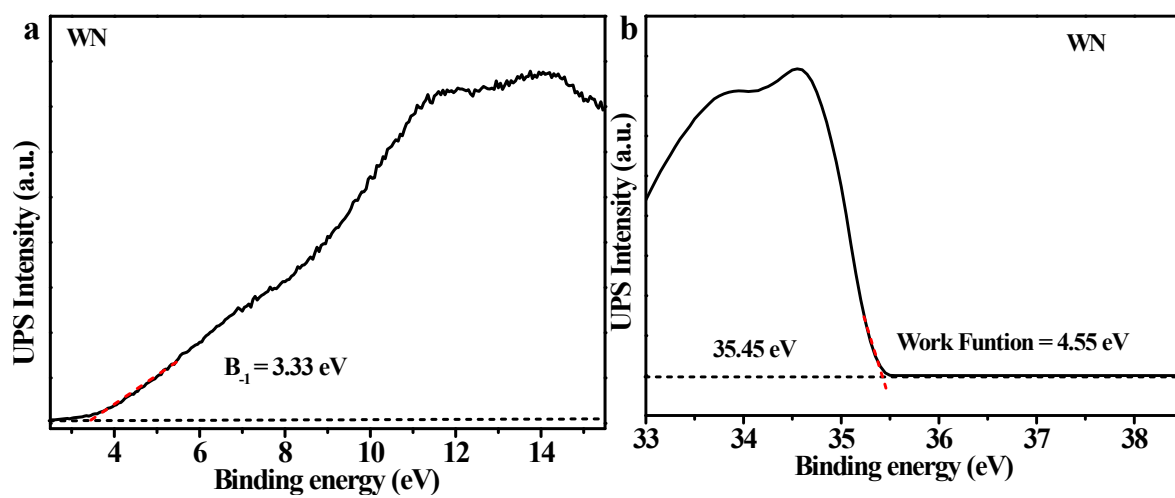

**Figure S5.** UPS spectrum of WN NPs.

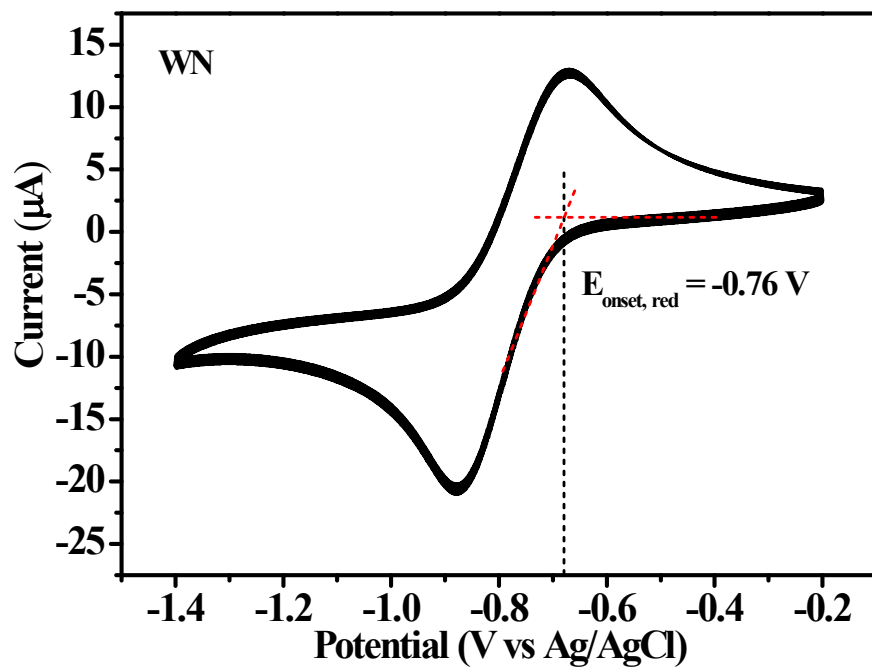

Figure S6. Cyclic voltammetry (CV) measurements of WN NPs.(b).

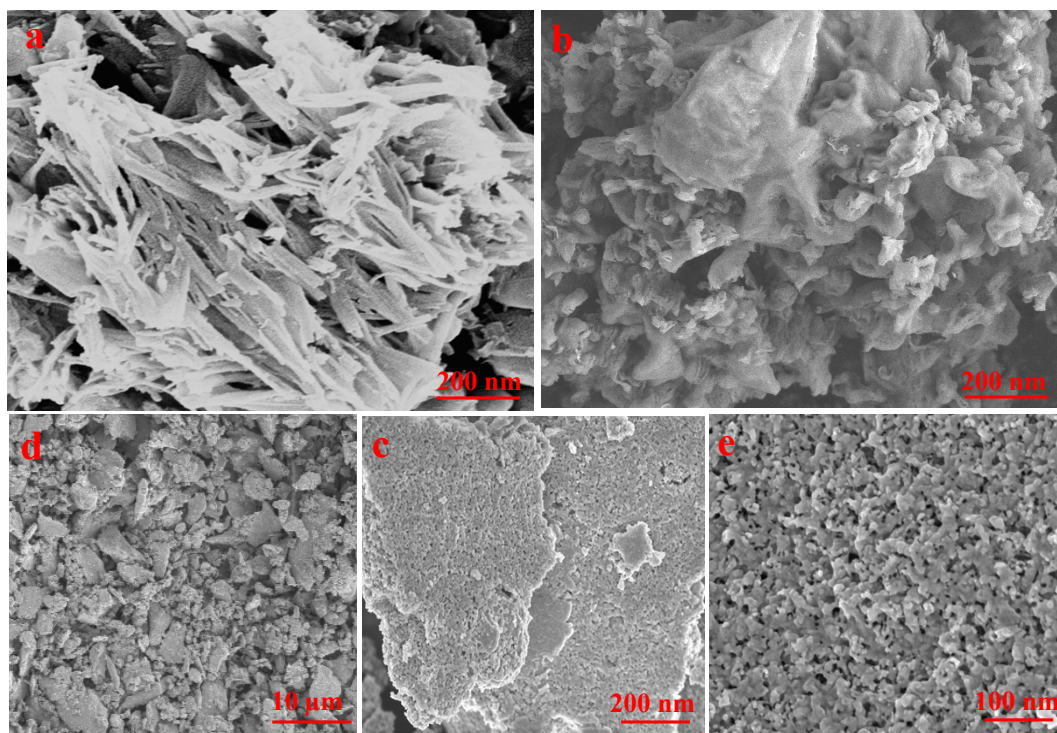

Figure S7. SEM images of  $\text{g-C}_3\text{N}_4$  (a), WN/CN-1(b) and WN NPs (c-e).

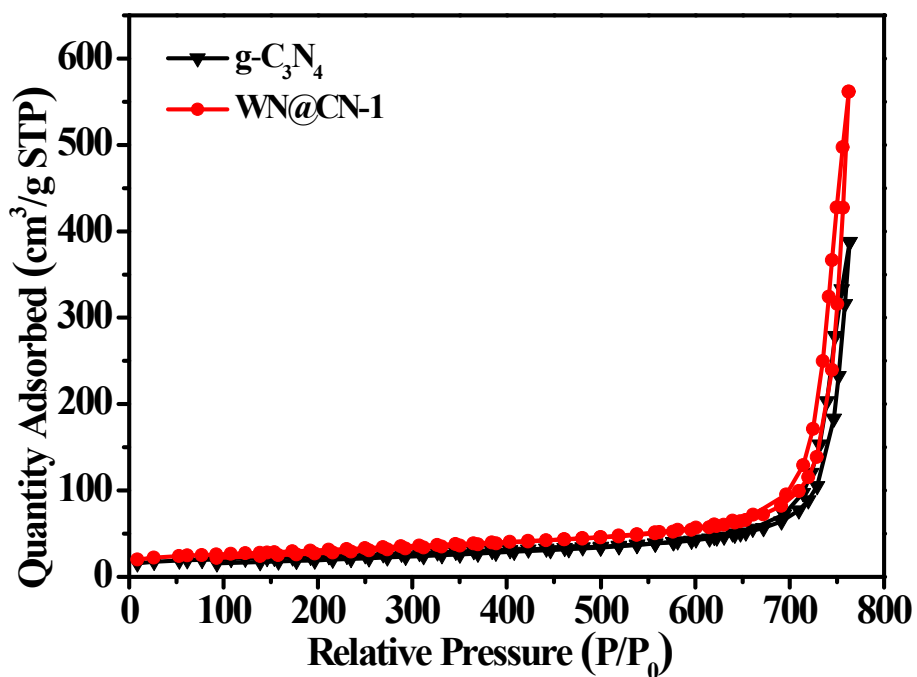

**Figure S8.** Nitrogen adsorption-desorption isotherm of  $g\text{-C}_3\text{N}_4$  and WN/CN-1.

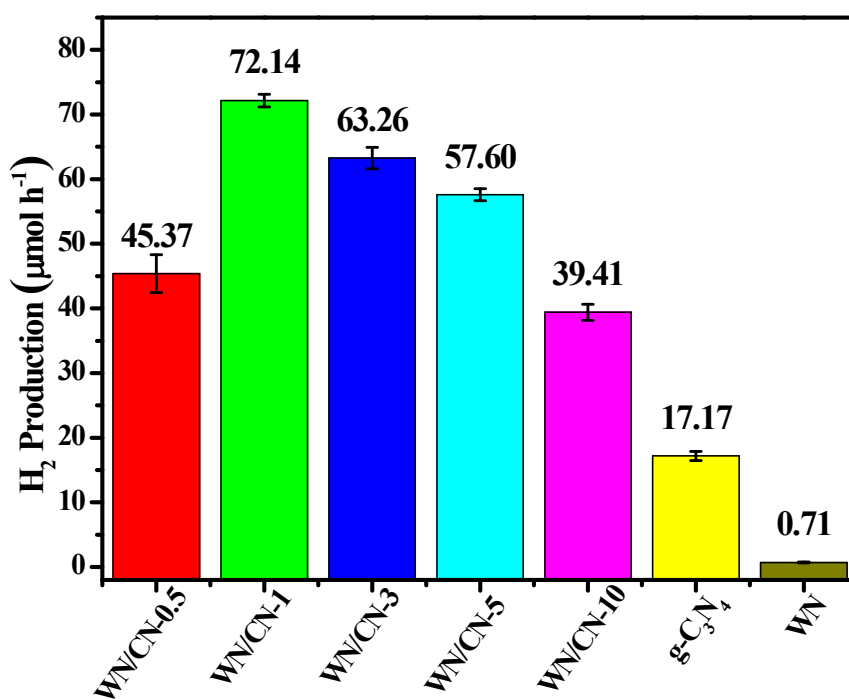

**Figure S9.**  $\text{H}_2$  evolution comparison of a series of WN/CN-x samples with different contents of WN NPs and  $g\text{-C}_3\text{N}_4$  under visible region.

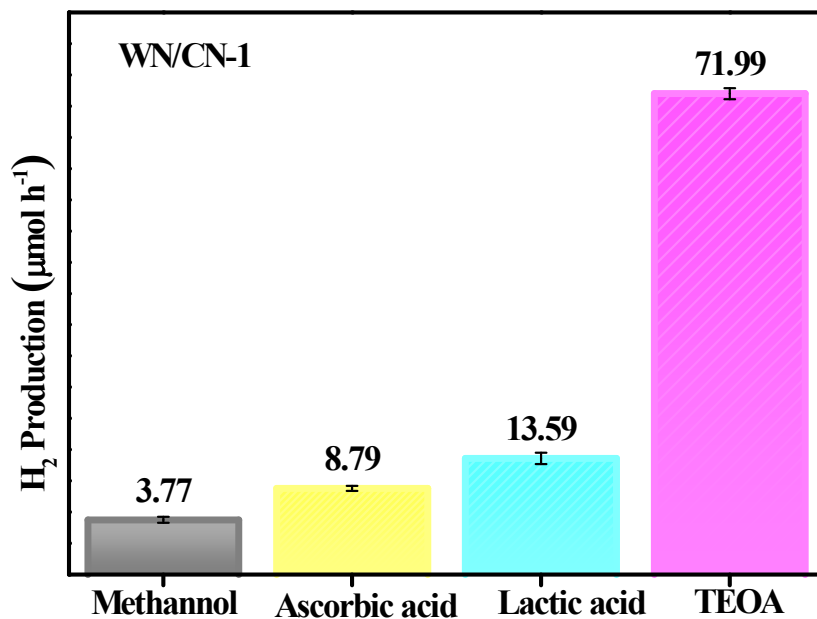

**Figure S10.** H<sub>2</sub> evolution comparison of a series of WN/CN-x samples with different sacrificial agents.

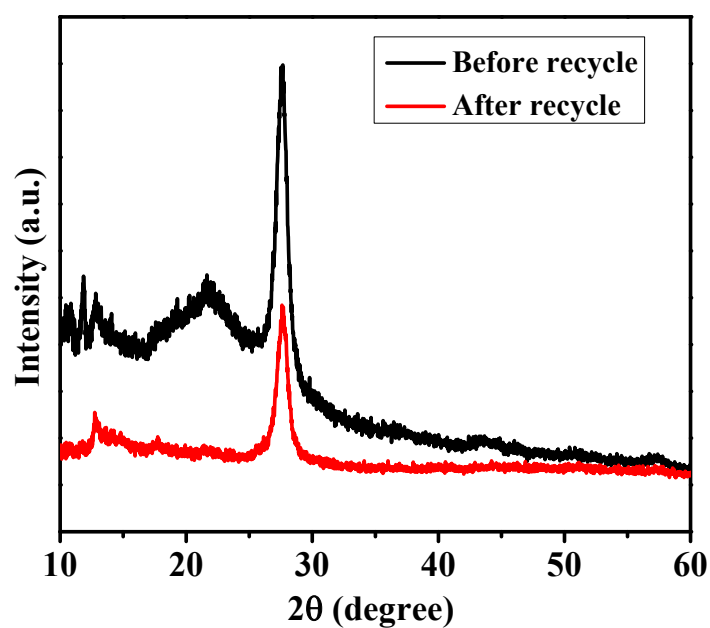

**Figure S11.** XRD spectra of WN/CN-1 composite before and after the photocatalytic experiment.

## REFERENCES

1. M. A. Alcudia-Ramos, M. A. Fuentez-Torres, F. Ortiz-Chi, C. G. Espinosa-González, N. Hernández-Como, D. S. García-Zaleta, M. K. Kesarla, J. G. Torres-Torres, V. Collins-Martínez, S. Godavarthi, *Ceram. Int.*, 2020, **46**, 38-45.
  2. R. Zhong, Z. Zhang, H. Yi, L. Zeng, C. Tang, L. Huang, M. Gu, *Appl. Catal. B: Environ.*, 2018, **237**, 1130-1138.
  3. X. Wei, C. Shao, X. Li, N. Lu, K. Wang, Z. Zhang, Y. Liu, *Nanoscale*, 2016, **8**, 11034.
  4. M. Kombo, H.-B. Chong, L.-B. Ma, S. Sahar, X.-X. Fang, T. Zhao, C. Ling, X.-J. Lu, A.-W. Xu, *ACS Appl. Nano Mater.*, 2020, **3**, 10659-10667.
  5. Z. Mao, J. Chen, Y. Yang, D. Wang, L. Bie, B. D. Fahlman, *ACS Appl. Mater. Inter.*, 2017, **9**, 12427-12435.
- J. Chen, D. Zhao, Z. Diao, M. Wang, S. Shen, *Sci. Bull.*, 2016, **61**, 292-301.
